# Supplementary material for: Integrative Analysis of Single-Cell and Bulk Sequencing Data Depicting the Expression and Function of P2ry12 in Microglia Post Ischemia–Reperfusion Injury
Source: MDPI journal article supplement (doi:10.3390/ijms24076772), 2023-04-05
Supplement: s1 [file s1]

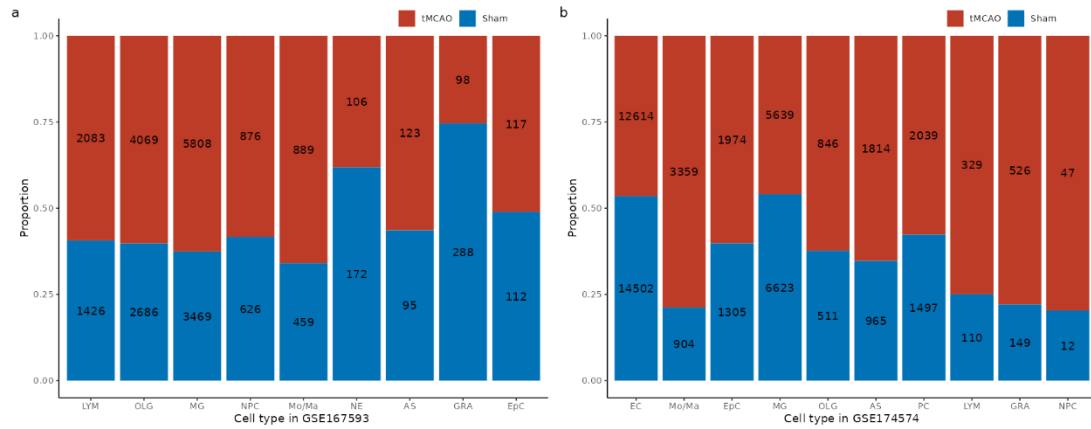

**Figure S1.** Details of the demographic characteristics in scRNA-seq data. (a) and (b) Column plots show cell number and proportion of each cell type from different groups in GSE167593 and GSE174574, respectively.

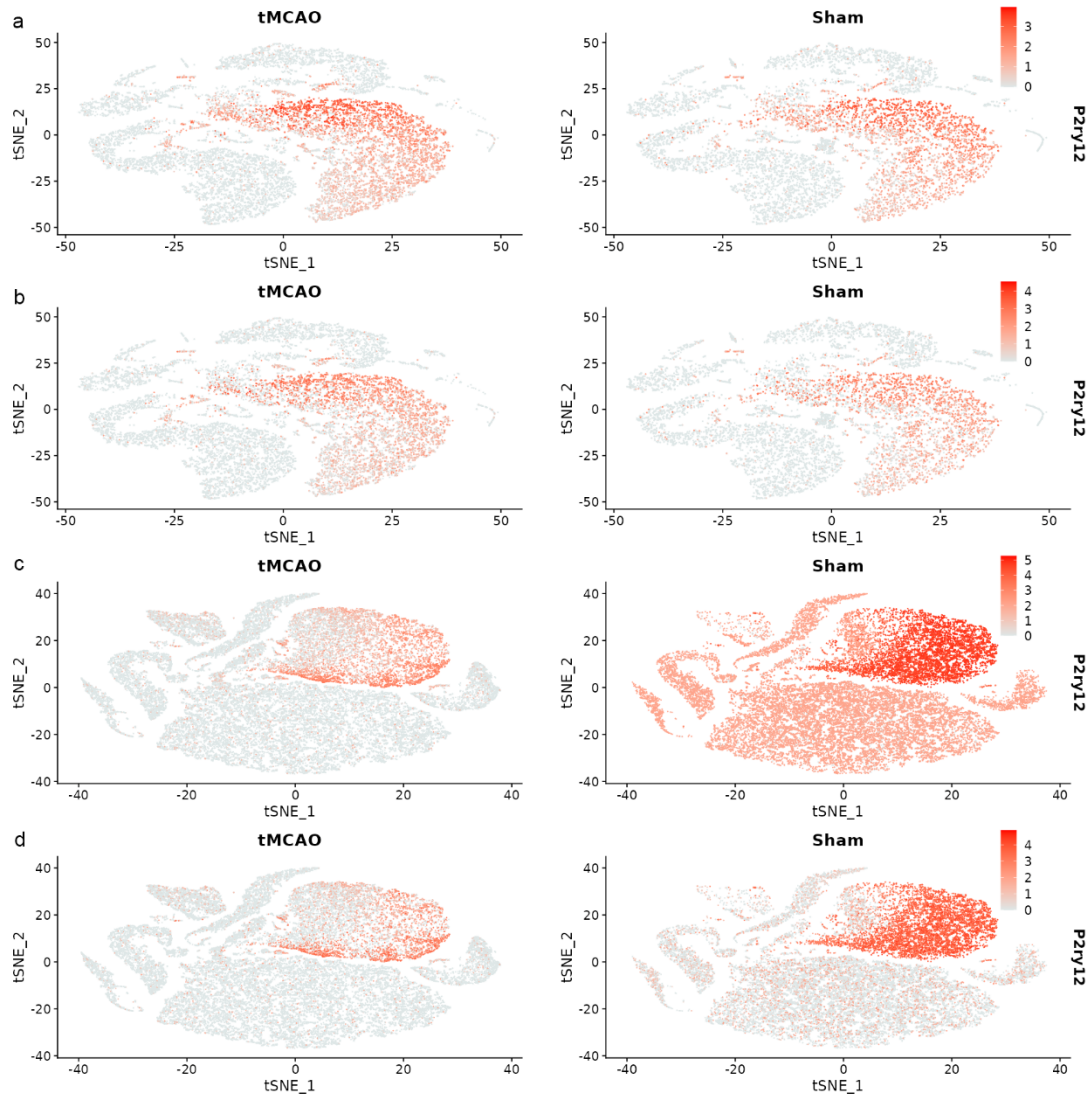

**Figure S2.** Distribution of P2ry12 Gene Expression in Single-Cell RNA-Seq Data. (a) t-SNE visualization of P2ry12 expression in imputed GSE167593 dataset. (b) t-SNE representation of P2ry12 expression in pre-imputed GSE167593 dataset. (c) t-SNE representation of P2ry12 expression in imputed GSE174574 dataset.

(d) t-SNE representation of P2ry12 expression in pre-imputed GSE174574 dataset.

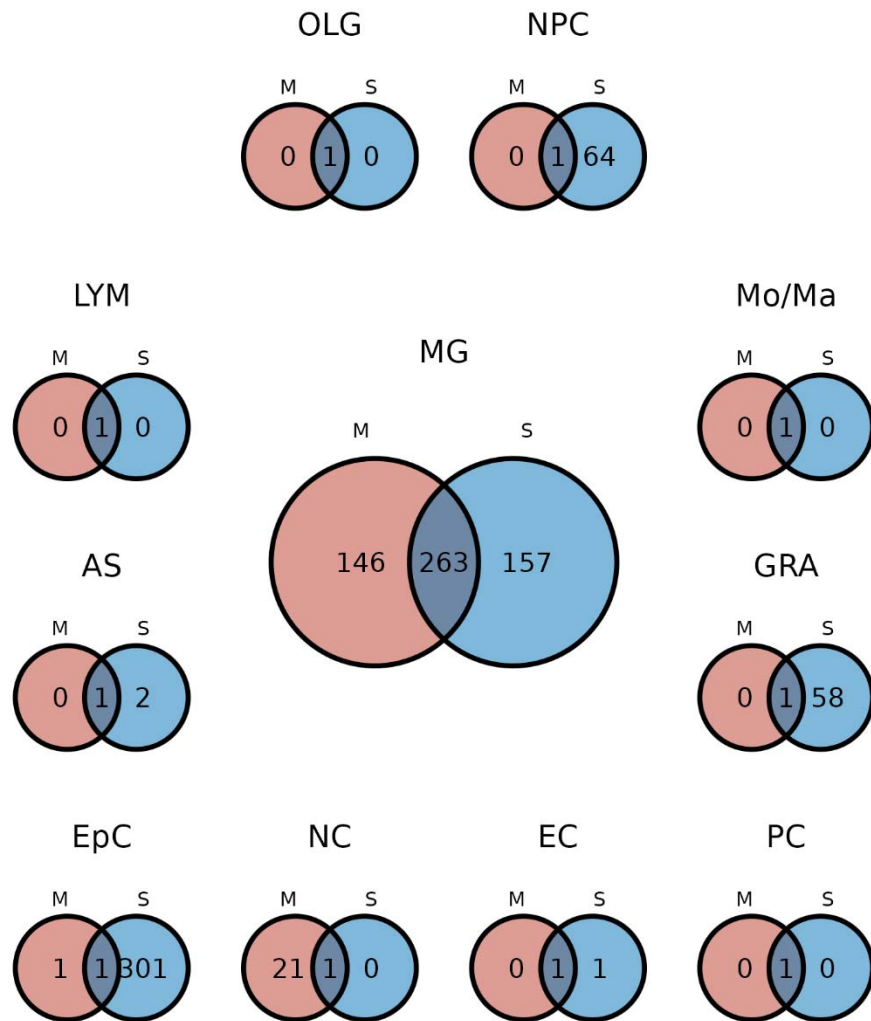

**Figure S3.** Venn diagram of P2ry12 correlated genes in tMCAO and Sham scRNA-seq data. This Venn diagram represents the overlap of genes that are positively correlated with P2ry12 in two experimental groups: tMCAO and Sham. The correlation coefficient was calculated using scRNA-seq data and was considered significant if its absolute value was greater than 0.6. The diagram shows the number of genes that are unique to each group as well as the genes that overlap between the groups. M, tMCAO; S, Sham; LYM, lymphocytes; OLG, oligodendrocytes; MG, microglia; NPC, neural progenitor cells; Mo/Ma, monocytes/macrophages; NC, neurons; AS, astrocytes; GRA, granulocytes; EpC, ependymal cells; EC, endothelial cells; PC, perivascular cells.

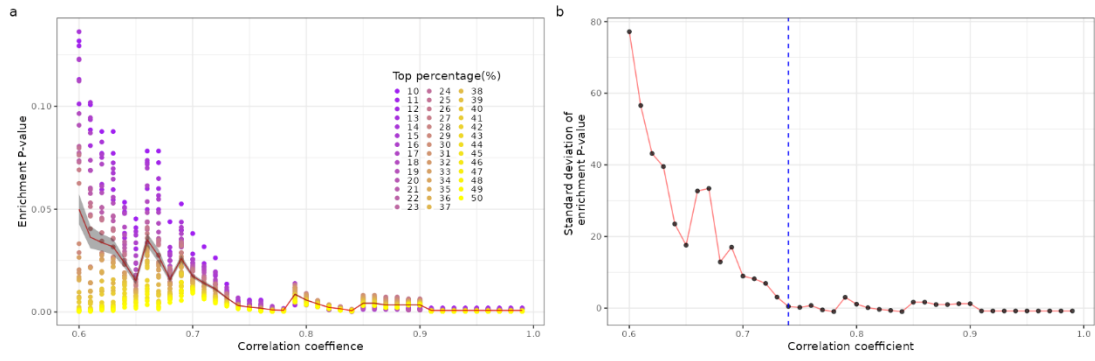

**Figure S4.** Determining the Optimal Correlation Coefficient for Microglia-Specific P2ry12 Genes (MSPGs). (a) The panel shows the results of a minimum-hypergeometric test evaluating the enrichment of sets of P2ry12 positive correlation genes obtained using different consecutive correlation coefficient cut-off thresholds (0.60, 0.61, ..., 0.99) in the bulk-seq data-derived rank list obtained using different consecutive top percentage cut-off thresholds (10%, 11%, ..., 50%). The mean enrichment P-value is displayed as a red curve, and the standard error of the mean is represented by the grey ribbon. (b) The panel displays the standard deviation of the sets of enrichment P-values derived from different correlation coefficients. The standard deviation is indicated by a black dot, and the optimal correlation coefficient of 0.74 is indicated by a dashed blue line on the X-axis.

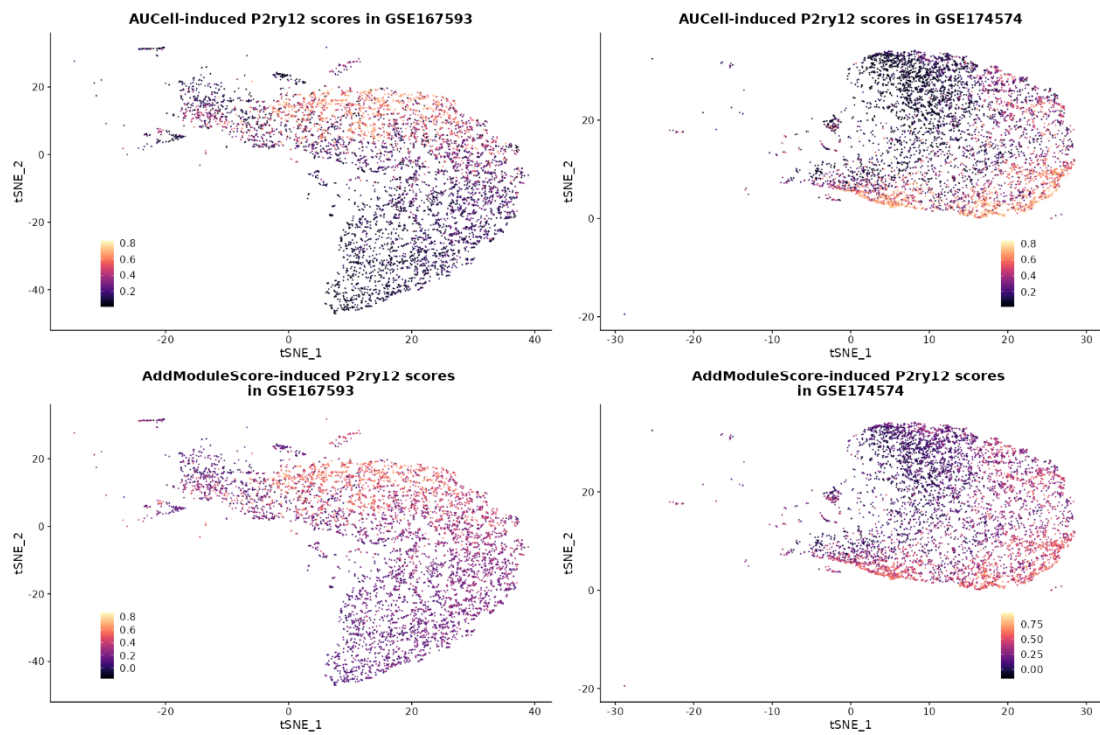

**Figure S5.** t-SNE plots demonstrating the diverse expression patterns of MSPGs-induced scores generated using either AddModuleScore or AUCell in microglial cells.

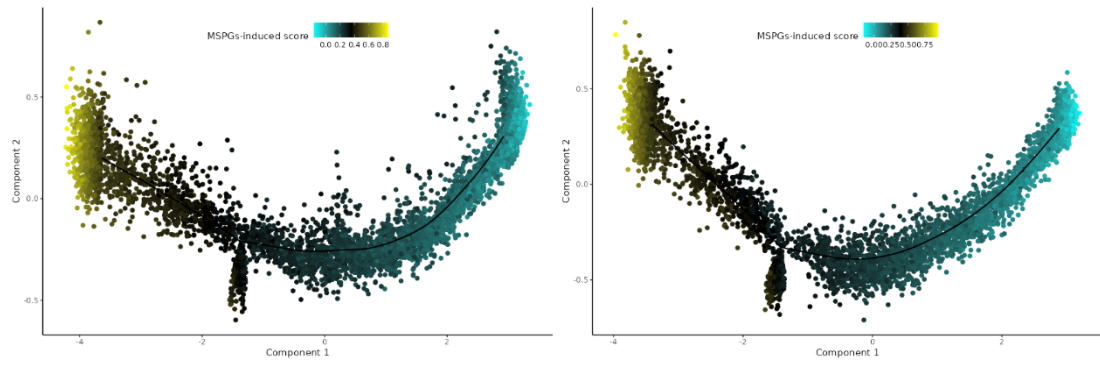

**Figure S6.** Projection of the MSPGs-induced scores computed by AUCell onto the trajectory of microglial cells.

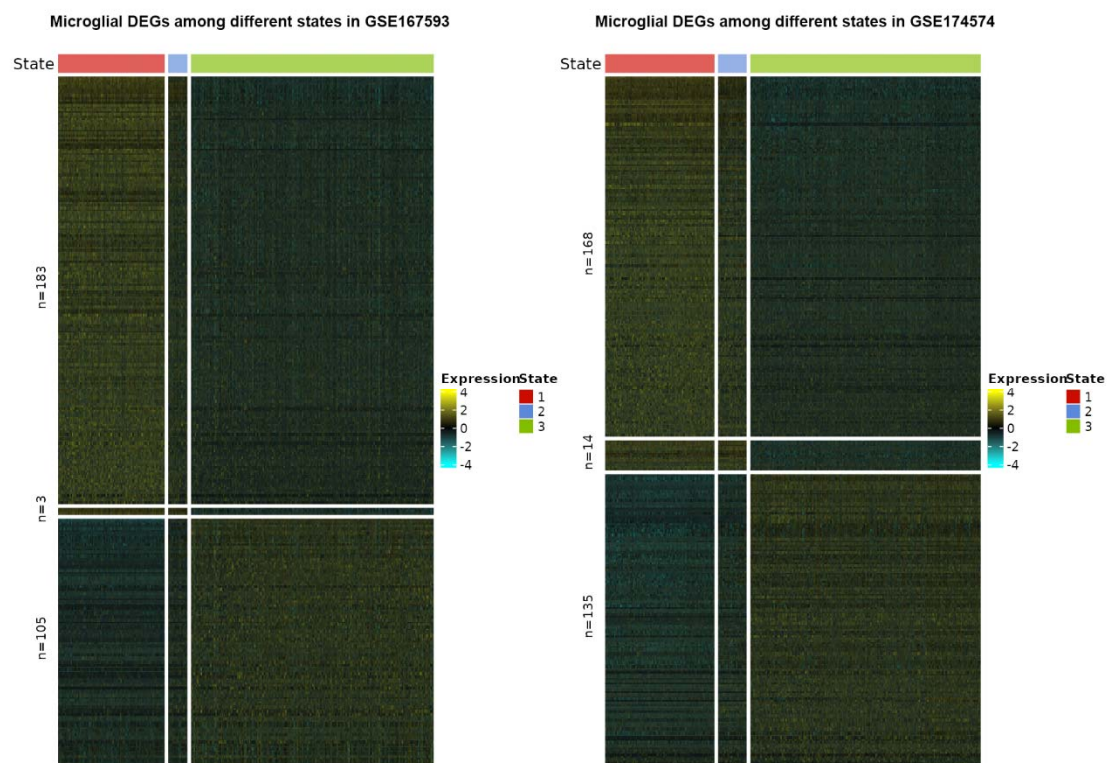

**Figure S7.** Differentially Expressed Genes in Different Microglial States. These heatmaps display the differentially expressed genes (DEGs) that are up-regulated in three distinct microglial states based on P2ry12 expression levels. The three microglial states are labeled as State 1 (high-P2ry12 microglia), State 2 (median-P2ry12 microglia), and State 3 (low-P2ry12 microglia). The number of up-regulated DEGs is indicated by "n".





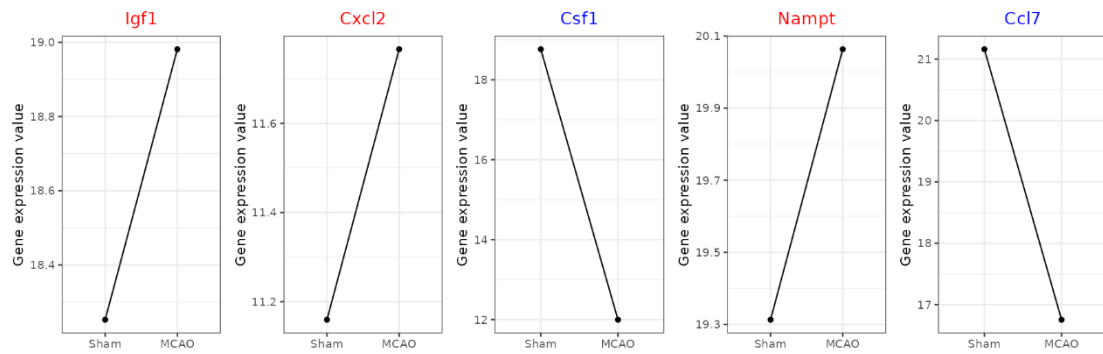

**Figure S9.** Expression trends of up-regulated ligand-encoding genes in microglia with low p2ry12 expression. These line plots display the expression tendencies of up-regulated ligand-encoding genes in low-P2ry12 microglia in integrated bulk-seq data. The genes that pass a specified test are indicated in red, while genes that do not pass the test are indicated in blue.

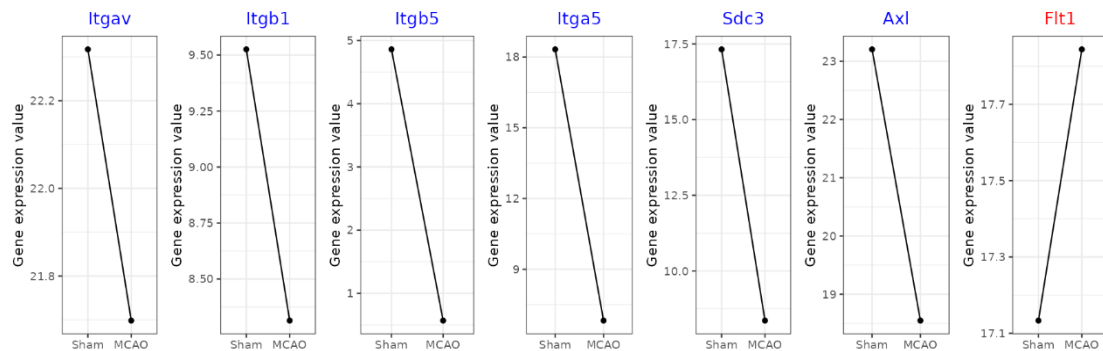

**Figure S10.** Expression trends of up-regulated receptor-encoding genes in microglia with low p2ry12 expression. These line plots display the expression tendencies of up-regulated receptor-encoding genes in low-P2ry12 microglia in integrated bulk-seq data. The genes that pass a specified test are indicated in red, while genes that do not pass the test are indicated in blue.

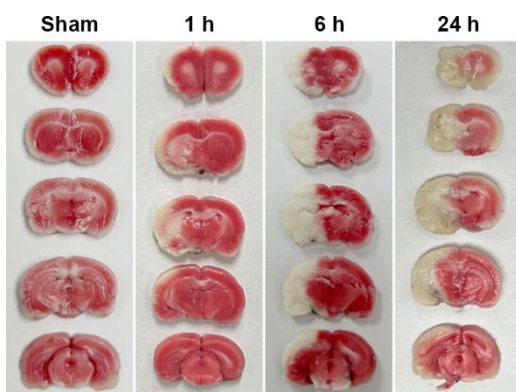

**Figure S11.** shows 2,3,5-tetraphenyltetrazolium chloride (TTC) staining results of rat brain slices following a 1-hour occlusion of the left external carotid artery and sham surgery. The images were taken at 1 hour, 6 hours, and 24 hours after reperfusion. The white color areas indicate regions of brain injury, while the red color areas represent normal brain tissue.

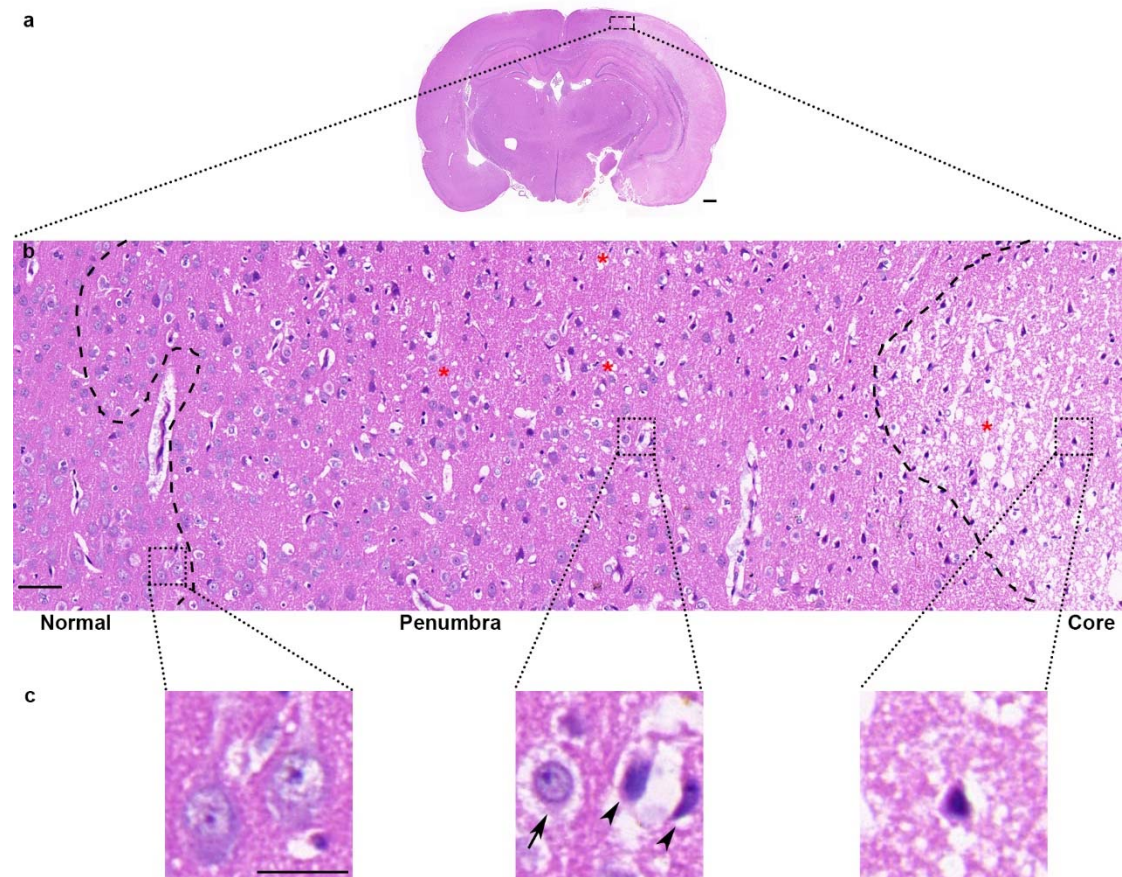

**Figure S12.** Morphological variation of rat brain undergoing IRI in HE staining. **(a)** Coronal section of the brain shows a pale region indicating an ischemic core lesion. **(b)** A zoom-in of the area indicated by the black rectangle in **(a)** shows three distinct regions: normal, penumbra, and ischemic core, separated by two dashed curves. Red asterisks indicate neuropil vacuolation. **(c)** Zoom-ins of representative neurons in the three regions in **(b)**. The left image shows two neurons with large nuclei, fine chromatin, and obvious nucleoli. The middle image shows a relatively normal neuron (arrow) and two necrotic neurons (arrowheads) with peri-cellular halos. The right image shows a shrunken necrotic neuron within the neuropil with vacuolation changes. (Scale bars: 500 $\mu$ m for **(a)**, 50 $\mu$ m for **(b)**, and 20 $\mu$ m for **(c)**)

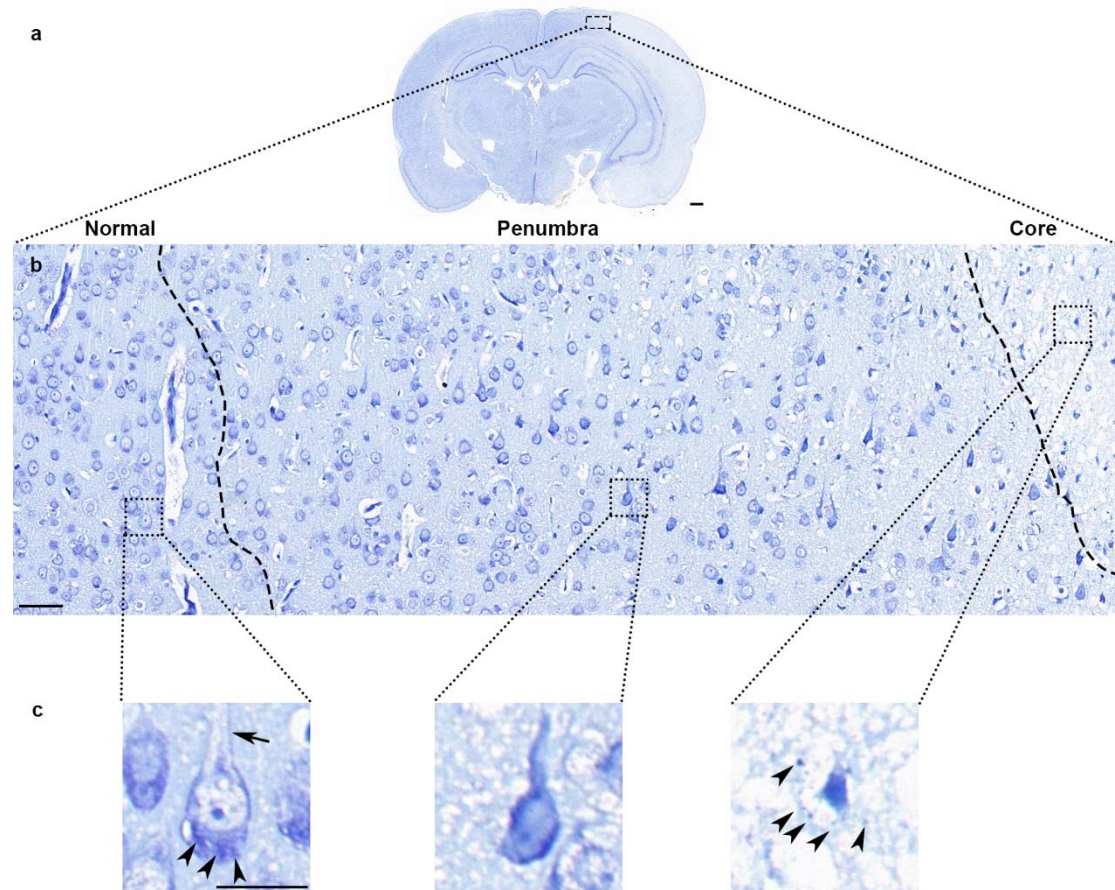

**Figure S13.** Morphological variation of rat brain undergoing IRI in Nissl staining. (a) Coronal section of the brain shows a pale region indicating an ischemic core lesion. (b) A zoom-in of the area indicated by the black rectangle in (a) shows three distinct regions: normal, penumbra, and ischemic core, separated by two dashed curves. (c) Zoom-ins of representative neurons in the three regions in (b). The left image shows a neuron at the center with a large nucleus, leptochromatin, and an obvious nucleolus, with clumps of Nissl substrates deposited in the perikarya (arrowheads) but not in the axon (arrow). The middle image shows a necrotic neuron with a shrunken nucleus and an inconspicuous nucleolus, with the deposition of Nissl substrates in both the perikarya and axon. The right image shows a completely shrunken necrotic neuron embedded in vacuolated neuropil, accompanied by surrounding necrotic debris (arrowheads). (Scale bars: 500 $\mu$ m for (a), 50 $\mu$ m for (b), and 20 $\mu$ m for (c))

**Table S1** Imputed and pre-imputed P2ry12 expression value in populations of GSE167593

| Population  | Group | Data_type   | Min.   | 1stQ   | Median | 3stQ   | Max.   | Mean   | DR     |
|-------------|-------|-------------|--------|--------|--------|--------|--------|--------|--------|
| Lymphocytes | tMCAO | Pre_imputed | 0.0000 | 0.0000 | 0.0000 | 0.0000 | 2.7891 | 0.0616 | 0.9534 |
| Lymphocytes | tMCAO | Imputed     | 0.0000 | 0.0000 | 0.0000 | 0.0000 | 2.7891 | 0.0661 | 0.9453 |
| Lymphocytes | Sham  | Pre_imputed | 0.0000 | 0.0000 | 0.0000 | 0.0000 | 2.9037 | 0.0556 | 0.9509 |
| Lymphocytes | Sham  | Imputed     | 0.0000 | 0.0000 | 0.0000 | 0.0000 | 2.9037 | 0.0608 | 0.9425 |
| OLG         | tMCAO | Pre_imputed | 0.0000 | 0.0000 | 0.0000 | 0.0000 | 2.9574 | 0.0523 | 0.9548 |
| OLG         | tMCAO | Imputed     | 0.0000 | 0.0000 | 0.0000 | 0.0000 | 2.9574 | 0.0551 | 0.9489 |
| OLG         | Sham  | Pre_imputed | 0.0000 | 0.0000 | 0.0000 | 0.0000 | 2.8124 | 0.0607 | 0.9471 |
| OLG         | Sham  | Imputed     | 0.0000 | 0.0000 | 0.0000 | 0.0000 | 2.8124 | 0.0640 | 0.9386 |



|                 |       |             |        |        |        |        |        |        |        |
|-----------------|-------|-------------|--------|--------|--------|--------|--------|--------|--------|
| Microglia       | tMCAO | Pre_imputed | 0.0000 | 0.0000 | 1.1238 | 2.0184 | 4.5488 | 1.2048 | 0.2936 |
| Microglia       | tMCAO | Imputed     | 0.0000 | 0.7766 | 1.2509 | 2.0915 | 3.9589 | 1.4334 | 0.1181 |
| Microglia       | Sham  | Pre_imputed | 0.0000 | 0.0000 | 1.3502 | 2.1378 | 3.7950 | 1.2965 | 0.2718 |
| Microglia       | Sham  | Imputed     | 0.0000 | 0.8862 | 1.5145 | 2.2821 | 3.7794 | 1.5766 | 0.0911 |
| NPC             | tMCAO | Pre_imputed | 0.0000 | 0.0000 | 0.0000 | 0.0000 | 3.4526 | 0.0528 | 0.9600 |
| NPC             | tMCAO | Imputed     | 0.0000 | 0.0000 | 0.0000 | 0.0000 | 3.4526 | 0.0558 | 0.9521 |
| NPC             | Sham  | Pre_imputed | 0.0000 | 0.0000 | 0.0000 | 0.0000 | 1.6568 | 0.0370 | 0.9601 |
| NPC             | Sham  | Imputed     | 0.0000 | 0.0000 | 0.0000 | 0.0000 | 1.6568 | 0.0391 | 0.9553 |
| Mo/Ma           | tMCAO | Pre_imputed | 0.0000 | 0.0000 | 0.0000 | 0.3509 | 2.3943 | 0.1840 | 0.7109 |
| Mo/Ma           | tMCAO | Imputed     | 0.0000 | 0.0000 | 0.0000 | 0.4474 | 2.3916 | 0.2195 | 0.6558 |
| Mo/Ma           | Sham  | Pre_imputed | 0.0000 | 0.0000 | 0.0000 | 0.3106 | 3.5027 | 0.1885 | 0.7320 |
| Mo/Ma           | Sham  | Imputed     | 0.0000 | 0.0000 | 0.0000 | 0.4630 | 2.8272 | 0.2257 | 0.6688 |
| Neurons         | tMCAO | Pre_imputed | 0.0000 | 0.0000 | 0.0000 | 0.0000 | 2.4602 | 0.0284 | 0.9811 |
| Neurons         | tMCAO | Imputed     | 0.0000 | 0.0000 | 0.0000 | 0.0000 | 2.4602 | 0.0344 | 0.9717 |
| Neurons         | Sham  | Pre_imputed | 0.0000 | 0.0000 | 0.0000 | 0.0000 | 2.1246 | 0.0649 | 0.9360 |
| Neurons         | Sham  | Imputed     | 0.0000 | 0.0000 | 0.0000 | 0.0000 | 1.7521 | 0.0645 | 0.9244 |
| Astrocytes      | tMCAO | Pre_imputed | 0.0000 | 0.0000 | 0.0000 | 0.0000 | 3.1547 | 0.0963 | 0.9512 |
| Astrocytes      | tMCAO | Imputed     | 0.0000 | 0.0000 | 0.0000 | 0.0000 | 3.1547 | 0.1150 | 0.9268 |
| Astrocytes      | Sham  | Pre_imputed | 0.0000 | 0.0000 | 0.0000 | 0.0000 | 3.0054 | 0.1309 | 0.9368 |
| Astrocytes      | Sham  | Imputed     | 0.0000 | 0.0000 | 0.0000 | 0.0000 | 3.0054 | 0.1097 | 0.9368 |
| Granulocytes    | tMCAO | Pre_imputed | 0.0000 | 0.0000 | 0.0000 | 0.0000 | 2.0146 | 0.0846 | 0.9388 |
| Granulocytes    | tMCAO | Imputed     | 0.0000 | 0.0000 | 0.0000 | 0.0000 | 2.0146 | 0.0968 | 0.9082 |
| Granulocytes    | Sham  | Pre_imputed | 0.0000 | 0.0000 | 0.0000 | 0.0000 | 3.0995 | 0.1084 | 0.9340 |
| Granulocytes    | Sham  | Imputed     | 0.0000 | 0.0000 | 0.0000 | 0.0000 | 3.0995 | 0.1339 | 0.8924 |
| Ependymal cells | tMCAO | Pre_imputed | 0.0000 | 0.0000 | 0.0000 | 0.0000 | 2.3425 | 0.0545 | 0.9402 |
| Ependymal cells | tMCAO | Imputed     | 0.0000 | 0.0000 | 0.0000 | 0.0000 | 2.3425 | 0.0572 | 0.9402 |
| Ependymal cells | Sham  | Pre_imputed | 0.0000 | 0.0000 | 0.0000 | 0.0000 | 0.8065 | 0.0113 | 0.9821 |
| Ependymal cells | Sham  | Imputed     | 0.0000 | 0.0000 | 0.0000 | 0.0000 | 0.8941 | 0.0121 | 0.9821 |

DR, dropout ratio; OLG, oligodendrocytes; NPC, neural progenitor cells; Mo/Ma, monocytes/macrophages.

**Table S2** Imputed and pre-imputed P2ry12 expression value in populations of GSE174574

| Population        | Group | Data_type   | Min.   | 1stQ   | Median | 3stQ   | Max.   | Mean   | DR     |
|-------------------|-------|-------------|--------|--------|--------|--------|--------|--------|--------|
| Endothelial cells | tMCAO | Pre_imputed | 0.0000 | 0.0000 | 0.0000 | 0.0000 | 2.6846 | 0.0785 | 0.9484 |
| Endothelial cells | tMCAO | Imputed     | 0.0000 | 0.0000 | 0.0000 | 0.0000 | 2.6846 | 0.0881 | 0.9371 |
| Endothelial cells | Sham  | Pre_imputed | 0.0000 | 0.0000 | 0.0000 | 0.0000 | 3.3430 | 0.3275 | 0.8072 |
| Endothelial cells | Sham  | Imputed     | 0.0000 | 1.9745 | 2.0474 | 2.1211 | 3.3575 | 1.9099 | 0.0741 |
| Mo/Ma             | tMCAO | Pre_imputed | 0.0000 | 0.0000 | 0.0000 | 0.0000 | 2.7679 | 0.1790 | 0.8500 |
| Mo/Ma             | tMCAO | Imputed     | 0.0000 | 0.0000 | 0.0000 | 0.0000 | 2.5499 | 0.2578 | 0.7586 |
| Mo/Ma             | Sham  | Pre_imputed | 0.0000 | 0.0000 | 0.0000 | 1.3176 | 3.3648 | 0.5981 | 0.6106 |
| Mo/Ma             | Sham  | Imputed     | 0.0000 | 2.0971 | 2.2967 | 2.4288 | 3.7637 | 2.1363 | 0.0586 |
| Ependymal cells   | tMCAO | Pre_imputed | 0.0000 | 0.0000 | 0.0000 | 0.0000 | 2.0568 | 0.0752 | 0.9311 |
| Ependymal cells   | tMCAO | Imputed     | 0.0000 | 0.0000 | 0.0000 | 0.0000 | 2.0568 | 0.0778 | 0.9281 |
| Ependymal cells   | Sham  | Pre_imputed | 0.0000 | 0.0000 | 0.0000 | 0.7735 | 3.1999 | 0.3740 | 0.6667 |

|                    |       |             |        |        |        |        |        |        |        |
|--------------------|-------|-------------|--------|--------|--------|--------|--------|--------|--------|
| Ependymal cells    | Sham  | Imputed     | 0.0000 | 2.0216 | 2.0803 | 2.1339 | 3.9304 | 2.0531 | 0.0192 |
| Microglia          | tMCAO | Pre_imputed | 0.0000 | 0.0000 | 1.2931 | 2.3014 | 4.5363 | 1.3067 | 0.3758 |
| Microglia          | tMCAO | Imputed     | 0.0000 | 1.0285 | 1.6136 | 2.5207 | 3.7574 | 1.6765 | 0.1509 |
| Microglia          | Sham  | Pre_imputed | 0.0000 | 3.2700 | 3.6563 | 3.9625 | 4.8844 | 3.5112 | 0.0149 |
| Microglia          | Sham  | Imputed     | 2.2024 | 4.4753 | 4.6472 | 4.7836 | 5.2713 | 4.5465 | 0.0000 |
| OLG                | tMCAO | Pre_imputed | 0.0000 | 0.0000 | 0.0000 | 0.0000 | 2.0628 | 0.0869 | 0.9232 |
| OLG                | tMCAO | Imputed     | 0.0000 | 0.0000 | 0.0000 | 0.0000 | 2.0628 | 0.0946 | 0.9149 |
| OLG                | Sham  | Pre_imputed | 0.0000 | 0.0000 | 0.0000 | 0.9268 | 1.8846 | 0.3744 | 0.6536 |
| OLG                | Sham  | Imputed     | 0.0000 | 2.0433 | 2.0980 | 2.1460 | 3.0231 | 2.0830 | 0.0078 |
| Astrocytes         | tMCAO | Pre_imputed | 0.0000 | 0.0000 | 0.0000 | 0.0000 | 2.7065 | 0.1322 | 0.9024 |
| Astrocytes         | tMCAO | Imputed     | 0.0000 | 0.0000 | 0.0000 | 0.0000 | 2.7065 | 0.1471 | 0.8820 |
| Astrocytes         | Sham  | Pre_imputed | 0.0000 | 0.0000 | 0.0000 | 1.0830 | 3.2895 | 0.4314 | 0.7181 |
| Astrocytes         | Sham  | Imputed     | 0.0000 | 2.0435 | 2.1072 | 2.1712 | 4.0630 | 2.0654 | 0.0342 |
| Perivascular cells | tMCAO | Pre_imputed | 0.0000 | 0.0000 | 0.0000 | 0.0000 | 3.0048 | 0.0680 | 0.9505 |
| Perivascular cells | tMCAO | Imputed     | 0.0000 | 0.0000 | 0.0000 | 0.0000 | 3.0048 | 0.0756 | 0.9426 |
| Perivascular cells | Sham  | Pre_imputed | 0.0000 | 0.0000 | 0.0000 | 0.0000 | 2.6871 | 0.3472 | 0.7635 |
| Perivascular cells | Sham  | Imputed     | 0.0000 | 1.9822 | 2.0523 | 2.1270 | 3.5948 | 1.9765 | 0.0428 |
| Lymphocytes        | tMCAO | Pre_imputed | 0.0000 | 0.0000 | 0.0000 | 0.0000 | 1.9756 | 0.1021 | 0.9240 |
| Lymphocytes        | tMCAO | Imputed     | 0.0000 | 0.0000 | 0.0000 | 0.0000 | 2.1165 | 0.1422 | 0.8815 |
| Lymphocytes        | Sham  | Pre_imputed | 0.0000 | 0.0000 | 0.0000 | 0.0000 | 2.7594 | 0.3470 | 0.7636 |
| Lymphocytes        | Sham  | Imputed     | 0.0000 | 1.8589 | 1.9797 | 2.0617 | 3.4738 | 1.6990 | 0.1455 |
| Granulocytes       | tMCAO | Pre_imputed | 0.0000 | 0.0000 | 0.0000 | 0.0000 | 2.5300 | 0.1431 | 0.9163 |
| Granulocytes       | tMCAO | Imputed     | 0.0000 | 0.0000 | 0.0000 | 0.0000 | 2.4011 | 0.2007 | 0.8536 |
| Granulocytes       | Sham  | Pre_imputed | 0.0000 | 0.0000 | 0.0000 | 0.9004 | 3.8773 | 0.5126 | 0.6711 |
| Granulocytes       | Sham  | Imputed     | 1.8637 | 2.0888 | 2.1854 | 2.2799 | 4.5841 | 2.2513 | 0.0000 |
| NPC                | tMCAO | Pre_imputed | 0.0000 | 0.0000 | 0.0000 | 0.0000 | 2.0180 | 0.1979 | 0.8298 |
| NPC                | tMCAO | Imputed     | 0.0000 | 0.0000 | 0.0000 | 0.8688 | 2.0180 | 0.3377 | 0.7021 |
| NPC                | Sham  | Pre_imputed | 0.0000 | 0.0000 | 0.0000 | 0.4344 | 2.7707 | 0.5200 | 0.7500 |
| NPC                | Sham  | Imputed     | 0.0000 | 2.0621 | 2.0986 | 2.2279 | 3.1381 | 2.1027 | 0.0833 |

DR, dropout ratio; OLG, oligodendrocytes; Mo/Ma, monocytes/macrophages; NPC, neural progenitor cells.

**Table S3** P2ry12 correlation genes in microglia of single-cell expression profile

| Genename      | Corr in Sham | Corr in tMCAO |
|---------------|--------------|---------------|
| P2ry12        | 1            | 1             |
| Selplg        | 0.936572763  | 0.965191924   |
| Siglech       | 0.907457765  | 0.949658181   |
| Slc2a5        | 0.907420451  | 0.926555751   |
| Tmem119       | 0.903587485  | 0.962807635   |
| Vsir          | 0.89476639   | 0.938958088   |
| Crybb1        | 0.89123398   | 0.884848677   |
| Gpr34         | 0.889668529  | 0.891042553   |
| 0610040J01Rik | 0.883591958  | 0.893857937   |
| P2ry13        | 0.883210997  | 0.918135128   |

|               |             |             |
|---------------|-------------|-------------|
| Ptgs1         | 0.88214684  | 0.929760397 |
| Kcnk12        | 0.880605373 | 0.884981838 |
| Susd3         | 0.878897565 | 0.931351761 |
| Cmtm6         | 0.878726748 | 0.824526497 |
| Serinc3       | 0.876088553 | 0.758556579 |
| Lpcat2        | 0.874220909 | 0.930429071 |
| Fam105a       | 0.872088006 | 0.862261045 |
| Bbs9          | 0.870737527 | 0.819122107 |
| Upk1b         | 0.864976953 | 0.887091896 |
| F11r          | 0.862922056 | 0.848178578 |
| Hpgd          | 0.860109118 | 0.676445032 |
| Entpd1        | 0.858043848 | 0.843492445 |
| Cd164         | 0.856888856 | 0.649514312 |
| Commd8        | 0.85565689  | 0.813833117 |
| Slco2b1       | 0.855432999 | 0.814588615 |
| Atp8a2        | 0.849792473 | 0.828694204 |
| Agmo          | 0.8477917   | 0.830791291 |
| Adgrg1        | 0.847627104 | 0.860620221 |
| Gp9           | 0.847513235 | 0.885611149 |
| Cysltr1       | 0.847404734 | 0.809098579 |
| Gna15         | 0.847252816 | 0.858895988 |
| Lrrc3         | 0.846020324 | 0.876556779 |
| Tmem173       | 0.844601751 | 0.837333225 |
| BC035044      | 0.843979417 | 0.852590259 |
| Myl2          | 0.843977875 | 0.786650804 |
| Tpst2         | 0.842318247 | 0.783129466 |
| Rnase4        | 0.837100616 | 0.640508283 |
| Ctc1          | 0.835909508 | 0.815553921 |
| Pld4          | 0.835310218 | 0.73655391  |
| Capn3         | 0.834336836 | 0.871755605 |
| Csf1r         | 0.833180807 | 0.764226526 |
| Kcnd1         | 0.830119673 | 0.862138846 |
| Fgd2          | 0.827691725 | 0.836082761 |
| Golm1         | 0.825952244 | 0.814023856 |
| 2610528A11Rik | 0.825250642 | 0.830966877 |
| Snn           | 0.823477173 | 0.846766095 |
| Chst7         | 0.823091188 | 0.869575303 |
| Garnl3        | 0.821279254 | 0.831839254 |
| Pde3b         | 0.820544621 | 0.866517353 |
| Tubgcp5       | 0.820146802 | 0.677235705 |
| Sipa1         | 0.819074915 | 0.698714153 |
| Tgfb1r        | 0.816750476 | 0.789415679 |
| Cmtm7         | 0.814651253 | 0.766329243 |
| Hnmt          | 0.813392192 | 0.832872154 |

|               |             |             |
|---------------|-------------|-------------|
| Sult1a1       | 0.813252023 | 0.617841938 |
| Snta1         | 0.810255357 | 0.782798559 |
| St3gal5       | 0.810086956 | 0.879577187 |
| Sall1         | 0.809220247 | 0.870401503 |
| Hhex          | 0.809151576 | 0.690183214 |
| Col27a1       | 0.807499629 | 0.823152625 |
| Ogfrl1        | 0.80669422  | 0.663897222 |
| Rogdi         | 0.804479867 | 0.845371338 |
| St3gal6       | 0.80447602  | 0.69511085  |
| Ppcdc         | 0.801255043 | 0.79873672  |
| Cd33          | 0.797853865 | 0.754658846 |
| Ctsf          | 0.797561164 | 0.771240722 |
| Tnfrsf13b     | 0.795960663 | 0.757640338 |
| Rps6ka1       | 0.795028131 | 0.801293931 |
| A830008E24Rik | 0.794501167 | 0.871778463 |
| Bco2          | 0.793559848 | 0.838445712 |
| Il16          | 0.78993762  | 0.718869278 |
| Slc46a1       | 0.788803892 | 0.879213777 |
| Rtn4rl1       | 0.788077622 | 0.809785769 |
| Dapp1         | 0.786024001 | 0.756209036 |
| Gm3739        | 0.785055843 | 0.810022915 |
| Ifngr1        | 0.784643557 | 0.81690588  |
| Tanc2         | 0.783240635 | 0.885557827 |
| Arhgap5       | 0.782715643 | 0.772258229 |
| Ivns1abp      | 0.780178952 | 0.662544508 |
| Csmd3         | 0.779232886 | 0.822713938 |
| Prkab1        | 0.774945341 | 0.752917811 |
| Zfhx3         | 0.771835233 | 0.73664553  |
| Nrm           | 0.770631196 | 0.713232034 |
| Cxxc5         | 0.769655739 | 0.782698874 |
| Liph          | 0.769490552 | 0.751668589 |
| Csnk1e        | 0.767764152 | 0.751990171 |
| Siglece       | 0.767515302 | 0.656335091 |
| Scamp2        | 0.767134378 | 0.85517013  |
| Cx3cr1        | 0.766833513 | 0.917192599 |
| Prpsap2       | 0.764449406 | 0.691028687 |
| Rp2           | 0.76287572  | 0.739339765 |
| Il6ra         | 0.760593377 | 0.746912711 |
| Gm16118       | 0.759485077 | 0.798221389 |
| Ssh2          | 0.757858676 | 0.692773729 |
| Zfp710        | 0.754856501 | 0.697303142 |
| Mlph          | 0.753527711 | 0.768357048 |
| Ikzf1         | 0.753502304 | 0.831106682 |
| Bend6         | 0.751882431 | 0.789406064 |



|               |             |             |
|---------------|-------------|-------------|
| Cst3          | 0.751144815 | 0.786811597 |
| Cdh23         | 0.748860381 | 0.788024654 |
| Ebf3          | 0.748762569 | 0.789750158 |
| Hps4          | 0.748738019 | 0.777271162 |
| Cep152        | 0.747152706 | 0.614308226 |
| Elmo1         | 0.747058927 | 0.751272301 |
| Slc29a3       | 0.746234512 | 0.805602482 |
| Plcl2         | 0.745879421 | 0.815254242 |
| Nuak1         | 0.745571085 | 0.69693309  |
| Fscn1         | 0.744939456 | 0.814568012 |
| Inpp5d        | 0.743944176 | 0.733617461 |
| Tpbgl         | 0.743193315 | 0.811430217 |
| Alox5ap       | 0.742764922 | 0.669707639 |
| Hpgds         | 0.742409427 | 0.645934369 |
| Rcsd1         | 0.74180872  | 0.621266574 |
| Marcks        | 0.739683217 | 0.746948958 |
| Abhd15        | 0.738853402 | 0.688284087 |
| Srgap2        | 0.737172341 | 0.701829739 |
| Mfng          | 0.736752505 | 0.793019637 |
| Cask          | 0.736529138 | 0.671143021 |
| Gtf2h2        | 0.73610284  | 0.811204687 |
| Traf3ip3      | 0.735598873 | 0.779412823 |
| Abi3          | 0.735213414 | 0.818071802 |
| Bin2          | 0.734021875 | 0.853958702 |
| Pld1          | 0.732263996 | 0.698172766 |
| Nfam1         | 0.731320854 | 0.650454294 |
| Lrba          | 0.731277987 | 0.798374387 |
| Stambpl1      | 0.730884093 | 0.718249744 |
| Sft2d1        | 0.728569774 | 0.72149448  |
| Slco4a1       | 0.726133926 | 0.753341175 |
| Gm3488        | 0.725780798 | 0.729283105 |
| Icosl         | 0.725696567 | 0.662460612 |
| Tmx4          | 0.725611708 | 0.645491743 |
| I830077J02Rik | 0.725492765 | 0.799542861 |
| Sall3         | 0.724434985 | 0.807555113 |
| Gal3st4       | 0.723694727 | 0.813929159 |
| Laptm5        | 0.722365148 | 0.719290402 |
| Lair1         | 0.721930302 | 0.877801532 |
| Matk          | 0.721690737 | 0.778808809 |
| Akirin2       | 0.720157216 | 0.605781105 |
| Cd37          | 0.719991516 | 0.772357977 |
| Rab39         | 0.717986015 | 0.625914831 |
| Pag1          | 0.71681225  | 0.764527535 |
| Epb41l2       | 0.716334235 | 0.774050723 |

|               |             |             |
|---------------|-------------|-------------|
| Frmd4a        | 0.715153684 | 0.837586964 |
| Cryl1         | 0.713523181 | 0.672108531 |
| Unc93b1       | 0.711857899 | 0.662182762 |
| Tspan18       | 0.709868336 | 0.728467283 |
| Tmem135       | 0.709642235 | 0.720146185 |
| Gpr155        | 0.709424914 | 0.743730339 |
| Lactb         | 0.709278692 | 0.771042324 |
| Serpinf1      | 0.709059099 | 0.620689406 |
| Fam102b       | 0.706849177 | 0.75741867  |
| Sgce          | 0.705583481 | 0.742976645 |
| Arsk          | 0.705582665 | 0.692205805 |
| Casp8         | 0.704119406 | 0.696505286 |
| 2310040G24Rik | 0.701689923 | 0.637641213 |
| Cttnbp2nl     | 0.701553434 | 0.749027447 |
| Celf2         | 0.701269561 | 0.610650028 |
| Cryba4        | 0.701186427 | 0.811481401 |
| Arhgap22      | 0.701051666 | 0.730998792 |
| Sparc         | 0.699602829 | 0.723932887 |
| March1        | 0.699144231 | 0.777688827 |
| B4galt4       | 0.699136518 | 0.695811152 |
| Sash3         | 0.698507083 | 0.655559871 |
| Glul          | 0.698097462 | 0.629803227 |
| Mgat1         | 0.697793742 | 0.728518286 |
| Gng10         | 0.695911913 | 0.785593712 |
| Bid           | 0.694692827 | 0.71435766  |
| P3h2          | 0.692949935 | 0.699338663 |
| Fam212a       | 0.692540158 | 0.606983237 |
| Whrn          | 0.690978286 | 0.744087924 |
| C5ar2         | 0.690346397 | 0.600881577 |
| Tlr12         | 0.689763143 | 0.78581416  |
| Gm12166       | 0.688143996 | 0.618312608 |
| Mef2c         | 0.688059928 | 0.60683749  |
| Usp2          | 0.687297902 | 0.798819805 |
| Gcnt1         | 0.686030141 | 0.709476571 |
| Galnt12       | 0.683002425 | 0.853266477 |
| Ecsr          | 0.680108334 | 0.878287679 |
| Cd79b         | 0.678317756 | 0.75974717  |
| Arsb          | 0.677614338 | 0.66005343  |
| Armc3         | 0.674537742 | 0.680215397 |
| Twf2          | 0.673866038 | 0.679045814 |
| Gm3248        | 0.672997875 | 0.67571369  |
| Pecr          | 0.672855678 | 0.746660906 |
| Cd81          | 0.672287186 | 0.738184882 |
| Slc46a3       | 0.671864078 | 0.605416708 |

|           |             |             |
|-----------|-------------|-------------|
| Tspan14   | 0.671593792 | 0.771097266 |
| Klhdc8b   | 0.670543183 | 0.707796066 |
| Itgb5     | 0.66997469  | 0.708744014 |
| Gm10605   | 0.668362281 | 0.63358901  |
| Rassf5    | 0.668205828 | 0.709289624 |
| Cnot8     | 0.66817136  | 0.671162881 |
| Slc13a3   | 0.66790255  | 0.601983179 |
| Mtdh      | 0.667417116 | 0.802195739 |
| Pald1     | 0.666319181 | 0.616312725 |
| Adrb1     | 0.665301146 | 0.634078118 |
| Ifitm10   | 0.664996784 | 0.748418972 |
| Khk       | 0.663951206 | 0.607654223 |
| Usp21     | 0.662664038 | 0.716574109 |
| Ccng2     | 0.662648487 | 0.787961744 |
| Hsd17b11  | 0.661577364 | 0.681327465 |
| Prkca     | 0.661118728 | 0.65876828  |
| Smap2     | 0.660866063 | 0.772442661 |
| Med12l    | 0.65929085  | 0.767885185 |
| Trp53cor1 | 0.659151024 | 0.6808953   |
| Dock10    | 0.658789633 | 0.679139904 |
| BC037034  | 0.658529389 | 0.64482001  |
| Rab3ip    | 0.657415869 | 0.669440017 |
| Numb      | 0.657413915 | 0.740973895 |
| Gm3636    | 0.654903916 | 0.782836365 |
| Zbtb18    | 0.653559852 | 0.688388117 |
| Papss1    | 0.65289333  | 0.722196311 |
| Cd82      | 0.65287318  | 0.618098978 |
| Ncf1      | 0.651968544 | 0.683312081 |
| Rhoh      | 0.650654952 | 0.808703636 |
| Fbrsl1    | 0.649616059 | 0.68490309  |
| Tmem100   | 0.648816733 | 0.747876855 |
| Kcnk6     | 0.648011346 | 0.73720484  |
| Cyth4     | 0.647025002 | 0.669402966 |
| Rnf13     | 0.646213148 | 0.669590419 |
| Mgat4a    | 0.644910651 | 0.683908387 |
| Csf3r     | 0.642379165 | 0.671211944 |
| Mknk1     | 0.641100147 | 0.683609006 |
| Mdfi      | 0.641001514 | 0.618636478 |
| Hexb      | 0.638831618 | 0.802872947 |
| Slc16a6   | 0.63828108  | 0.86066891  |
| Sox4      | 0.637577321 | 0.729568314 |
| Taz       | 0.635621243 | 0.715496788 |
| Nav2      | 0.635006989 | 0.786994064 |
| Ppfia4    | 0.634980174 | 0.774812567 |

|               |              |              |
|---------------|--------------|--------------|
| Pdk1          | 0.634295471  | 0.707760904  |
| Parvg         | 0.631207623  | 0.801799029  |
| Oma1          | 0.630549747  | 0.727193547  |
| Ankrd44       | 0.630206665  | 0.63393863   |
| Csk           | 0.628403123  | 0.624609373  |
| Sema4g        | 0.626932851  | 0.609107275  |
| Tgif2         | 0.626692463  | 0.657264899  |
| Fam49b        | 0.626173395  | 0.780830541  |
| Olfm13        | 0.624130006  | 0.862677097  |
| Zfp385a       | 0.624056948  | 0.607290271  |
| 1810011H11Rik | 0.623940834  | 0.670964237  |
| Cebpz         | 0.62362757   | 0.621105442  |
| Gmip          | 0.622250458  | 0.632908258  |
| Arhgap4       | 0.62197632   | 0.707367399  |
| Ldhb          | 0.621307085  | 0.666042856  |
| H2-DMa        | 0.619351389  | 0.602607069  |
| Fcrl1         | 0.618006735  | 0.780315611  |
| Soga1         | 0.615527512  | 0.650634567  |
| Scoc          | 0.613020139  | 0.801930217  |
| Man1a2        | 0.61203896   | 0.705082003  |
| Vrk2          | 0.610639861  | 0.619901895  |
| Kif21b        | 0.609239403  | 0.611866475  |
| Tnfrsf21      | 0.607971986  | 0.733008035  |
| Acox3         | 0.60643261   | 0.630238377  |
| Tmem52        | 0.605664459  | 0.715672265  |
| Tmem68        | 0.605607685  | 0.612013289  |
| Accs          | 0.605387848  | 0.76284247   |
| Arhgap27      | 0.605005773  | 0.690352959  |
| Pnp           | 0.604965522  | 0.608147292  |
| Slc44a2       | 0.603442718  | 0.654164916  |
| Dip2b         | 0.603274856  | 0.653447     |
| Pou2f2        | 0.600941357  | 0.727894023  |
| Rab7b         | -0.656989619 | -0.661593453 |

---

Corr, correlation.



## **Appendix SA. Evaluation of Single-Cell Annotation Tools for Mouse Cerebral Cortical Cells**

Annotating single-cell transcriptomic maps involves labeling cell types or even subtypes with gene expression matrix. This process helps to understand the diversity of cell types and the underlying biological processes in a tissue or organism. Manual and automatic annotation methods are the two main categories of annotation techniques used for single-cell transcriptomic maps [1]. Manual annotation involves expert biologists who review the data and label cells based on their gene expression profiles. This method is time-consuming but provides high accuracy, as it is based on expert knowledge and can uncover novel cell types. However, manual annotation is limited in its scalability, as it requires significant resources and expertise. Automatic annotation, on the other hand, is performed using computational methods, such as clustering and gene set enrichment analysis. These methods process the data and label cells based on the similarity of their gene expression profiles to known cell types. This method is faster and more scalable, as it can process large amounts of data in a short amount of time. However, automatic annotation is limited in its accuracy, as it relies on the quality of the data and the algorithms used. Nevertheless, automatic annotation methods are typically more effective for annotating major cell types [2].

There are two main methods for automatic single-cell annotation: marker-based and reference-based [3]. Marker-based annotation relies on the identification of known cell type-specific markers, such as genes or proteins, to assign cell types

to individual cells. Reference-based annotation, on the other hand, compares the molecular and functional properties of individual cells to a reference set of annotated cells to assign cell types. Here, we utilized multiple commonly used automatic annotation tools to annotate the mouse cerebral cortical scRNA-seq data from SeuratData [4] ([https://seurat.nygenome.org/azimuth/demo\\_datasets/allen\\_mop\\_2020.rds](https://seurat.nygenome.org/azimuth/demo_datasets/allen_mop_2020.rds)). The scRNA-seq data consists of various cell types, including astrocytes, endothelial cells, microglia, neurons, oligodendrocytes, and perivascular cells. The annotated results were integrated in various combinations and compared to expert annotations within the data to determine the optimal approach for annotating the mouse cerebral cortical scRNA-seq data used in the main text. The tools we used for automatic annotation are shown in the following Table S4.

Table S4 summary of automatic annotation tools

| Type            | Tool              | Reference Source |
|-----------------|-------------------|------------------|
| Reference based | scmap-cluster [5] |                  |
|                 | scmap-cell [5]    | celldex          |
|                 | singleR [6]       |                  |
| Marker based    | SCINA [7]         | PanglaoDB [8]    |
|                 |                   | Cellmarker [9]   |

We employed three reference-based tools to annotate the mouse cerebral cortical scRNA-seq data. The tool "scmap-cluster" was used to compute the

centroids of each cell type and project them onto the query data. The other two reference-based tools project the cells of the input dataset to the individual cells of the reference. The reference scRNA-seq data used in this analysis was derived from a mouse motor dataset provided by the "cellDex" package. Additionally, a marker-based tool named "SCINA" was used, and it employed two marker reference data sources: "PanglaoDB" (available at <https://panglaoDB.se/index.html>) (accessed on 14 February 2023) and "Cellmarker" (available at <http://yikedaxue.slwshop.cn/>) (accessed on 14 February 2023).

The results obtained from these five methods were randomly combined to produce 31 different annotation results. The final annotated label for each cell was assigned based on the most common label across tools. Cells that lacked a clear cell type (i.e., different tools showed different results) were labeled as "ambiguous" in the combination.

To assess the accuracy of the automated annotations, the match rate between the cell types inferred by the different tools and the cell types provided by expert annotations was calculated in two ways: (1) match rate without ambiguous cells, which is calculated by excluding cells labeled as ambiguous, and (2) total match rate, which includes all cells. Of the 31 match results without ambiguous cells, 18 (58%) had an extremely high match rate exceeding 97%. Of the 31 total match results, 26 (84%) had a high match rate exceeding 90% (as shown in Table S5). In this study, as described in the main text, the downstream analysis was performed

using cells with clearly defined cell types. Therefore, we place particular emphasis on the match rate without ambiguous cells. Based on the analysis of the cell type match rates, a combination of SingleR, scmap-cell, and Cellmarker-based SCINA was found to be the optimal combination of automatic annotation tools for mouse cerebral cortical cells.

Table S5. Match rate between tool-derived and expert-provided cell types

| <b>Tool Names</b> | <b>MR</b> | <b>tMR</b> |
|-------------------|-----------|------------|
| Sc-R-Sm           | 0.9799    | 0.9649     |
| Sc-R-Sp           | 0.9799    | 0.9647     |
| Sl-R-Sm-Sp        | 0.9799    | 0.9621     |
| Sc-Sm             | 0.9794    | 0.9305     |
| Sc-R-Sm-Sp        | 0.9794    | 0.9636     |
| Sl-Sm             | 0.9791    | 0.9248     |
| R-Sm              | 0.9784    | 0.9336     |
| Sl-R-Sp           | 0.9782    | 0.9643     |
| Sl-R-Sm           | 0.9778    | 0.9651     |
| R-Sm-Sp           | 0.9764    | 0.9511     |
| Sl-R              | 0.9762    | 0.9571     |
| Sc-R              | 0.9761    | 0.9598     |
| Sl-Sm-Sp          | 0.9761    | 0.9518     |
| Sc-Sm-Sp          | 0.9757    | 0.9513     |
| Sl-Sp             | 0.9755    | 0.7654     |
| Sc-Sp             | 0.9750    | 0.7716     |
| R-Sp              | 0.9732    | 0.7741     |
| Sm-Sp             | 0.9709    | 0.7600     |
| Sl-Sc-R-Sm-Sp     | 0.9680    | 0.9668     |
| R                 | 0.9679    | 0.9589     |
| Sl-Sc-Sm-Sp       | 0.9679    | 0.9621     |
| Sl-Sc-R-Sm        | 0.9676    | 0.9640     |
| Sl-Sc-R-Sp        | 0.9671    | 0.9635     |
| Sl-Sc-Sm          | 0.9664    | 0.9658     |
| Sl-Sc-Sp          | 0.9661    | 0.9652     |
| Sl-Sc             | 0.9659    | 0.9534     |
| Sl-Sc-R           | 0.9642    | 0.9610     |
| Sc                | 0.9625    | 0.9598     |
| Sl                | 0.9571    | 0.9571     |
| Sm                | 0.9358    | 0.9358     |
| Sp                | 0.7762    | 0.7762     |



Sl, scmap-cluster; Sc, scmap-cell; R, singleR; Sp, SCINA based on PanglaoDB; Sm, SCINA based on Cellmarker; MR, match rate without ambiguous cells; tMR, total match rate.

1. Pasquini, G.; Rojo Arias, J. E.; Schafer, P.; Busskamp, V., Automated methods for cell type annotation on scRNA-seq data. *Comput Struct Biotechnol J* **2021**, *19*, 961-969.
2. Clarke, Z. A.; Andrews, T. S.; Atif, J.; Pouyababar, D.; Innes, B. T.; MacParland, S. A.; Bader, G. D., Tutorial: guidelines for annotating single-cell transcriptomic maps using automated and manual methods. *Nat Protoc* **2021**, *16*, 2749-2764.
3. Chen, Y.; Zhang, S., Automatic Cell Type Annotation Using Marker Genes for Single-Cell RNA Sequencing Data. *Biomolecules* **2022**, *12*.
4. Yao, Z.; Liu, H.; Xie, F.; Fischer, S.; Adkins, R. S.; Aldridge, A. I.; Ament, S. A.; Bartlett, A.; Behrens, M. M.; Van den Berge, K.; Bertagnolli, D.; de Bezieux, H. R.; Biancalani, T.; Boeshaghi, A. S.; Bravo, H. C.; Casper, T.; Colantuoni, C.; Crabtree, J.; Creasy, H.; Crichton, K.; Crow, M.; Dee, N.; Dougherty, E. L.; Doyle, W. I.; Dudoit, S.; Fang, R.; Felix, V.; Fong, O.; Giglio, M.; Goldy, J.; Hawrylycz, M.; Herb, B. R.; Hertzano, R.; Hou, X.; Hu, Q.; Kancherla, J.; Kroll, M.; Lathia, K.; Li, Y. E.; Lucero, J. D.; Luo, C.; Mahurkar, A.; McMillen, D.; Nadaf, N. M.; Nery, J. R.; Nguyen, T. N.; Niu, S. Y.; Ntranos, V.; Orvis, J.; Osteen, J. K.; Pham, T.; Pinto-Duarte, A.; Poirion, O.; Preissl, S.; Purdom, E.; Rimorin, C.; Risso, D.; Rivkin, A. C.; Smith, K.; Street, K.; Sulc, J.; Svensson, V.; Tieu, M.; Torkelson, A.; Tung, H.; Vaishnav, E. D.; Vanderburg, C. R.; van Velthoven, C.; Wang, X.; White, O. R.; Huang, Z. J.; Kharchenko, P. V.; Pachter, L.; Ngai, J.; Regev, A.; Tasic, B.; Welch, J. D.; Gillis, J.; Macosko, E. Z.; Ren, B.; Ecker, J. R.; Zeng, H.; Mukamel, E. A., A transcriptomic and epigenomic cell atlas of the mouse primary motor cortex. *Nature* **2021**, *598*, 103-110.
5. Kiselev, V. Y.; Yiu, A.; Hemberg, M., scmap: projection of single-cell RNA-seq data across data sets. *Nat Methods* **2018**, *15*, 359-362.
6. Aran, D.; Looney, A. P.; Liu, L.; Wu, E.; Fong, V.; Hsu, A.; Chak, S.; Naikawadi, R. P.; Wolters, P. J.; Abate, A. R.; Butte, A. J.; Bhattacharya, M., Reference-based analysis of lung single-cell sequencing reveals a transitional profibrotic macrophage. *Nat Immunol* **2019**, *20*, 163-172.
7. Zhang, Z.; Luo, D.; Zhong, X.; Choi, J. H.; Ma, Y.; Wang, S.; Mahrt, E.; Guo, W.; Stawiski, E. W.; Modrusan, Z.; Seshagiri, S.; Kapur, P.; Hon, G. C.; Brugarolas, J.; Wang, T., SCINA: A Semi-Supervised Subtyping Algorithm of Single Cells and Bulk Samples. *Genes (Basel)* **2019**, *10*.
8. Franzen, O.; Gan, L. M.; Bjorkegren, J. L. M., PanglaoDB: a web server for exploration of mouse and human single-cell RNA sequencing data. *Database (Oxford)* **2019**, *2019*.
9. Zhang, X.; Lan, Y.; Xu, J.; Quan, F.; Zhao, E.; Deng, C.; Luo, T.; Xu, L.; Liao, G.; Yan, M.; Ping, Y.; Li, F.; Shi, A.; Bai, J.; Zhao, T.; Li, X.; Xiao, Y., CellMarker: a manually curated resource of cell markers in human and mouse. *Nucleic Acids Res* **2019**, *47*, D721-D728.
